# Supplementary material
Source: publisher figshare collection journal article supplement (https://karger.figshare.com/ndownloader/files/23060822)
Supplement: Supplementary file 1 [file 23060822]

**Supplementary material. Gene polymorphism analysis**

Venous blood was collected into tubes containing ethylenediamine tetraacetic acid (EDTA), and genomic DNA was isolated with the G-DEX IIc Genomic DNA Extraction kit. Approximately 10 ng of genomic DNA was used for the TaqMan SNP Genotyping Assay. In total, fifteen SNPs were analyzed with the TaqMan Genotyping Assay on a 7900HT real-time polymerase chain reaction system (Applied Biosystems, Foster City, CA, USA) with software version 2.4. Amplification mixtures (5 µl) for each target contained template DNA (10 ng), 2X TaqMan Genotyping Master Mix, and 40X TaqMan SNP Genotyping Assay reagent in a 384-well plate. The cycling conditions were 10 min at 95°C, followed by 40 cycles of 15 s at 95°C, and 60 s at 60°C.
